# Supplementary figures and images for: Conserved visual capacity of rats under red light
Source: eLife journal article supplement (doi:10.7554/elife.66429), 2021-07-20

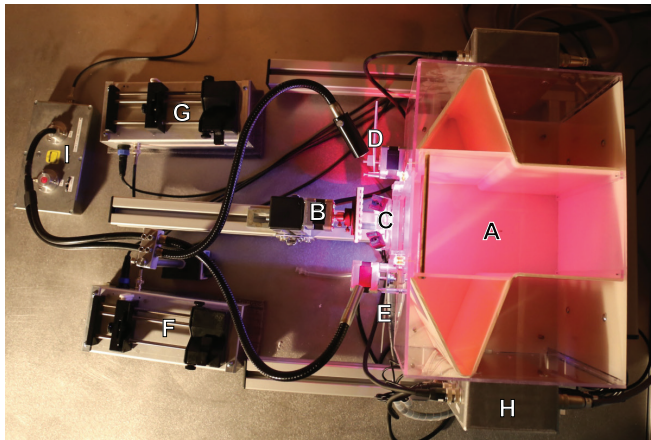

Supplement: supp [file elife-66429-supp-v1.zip]

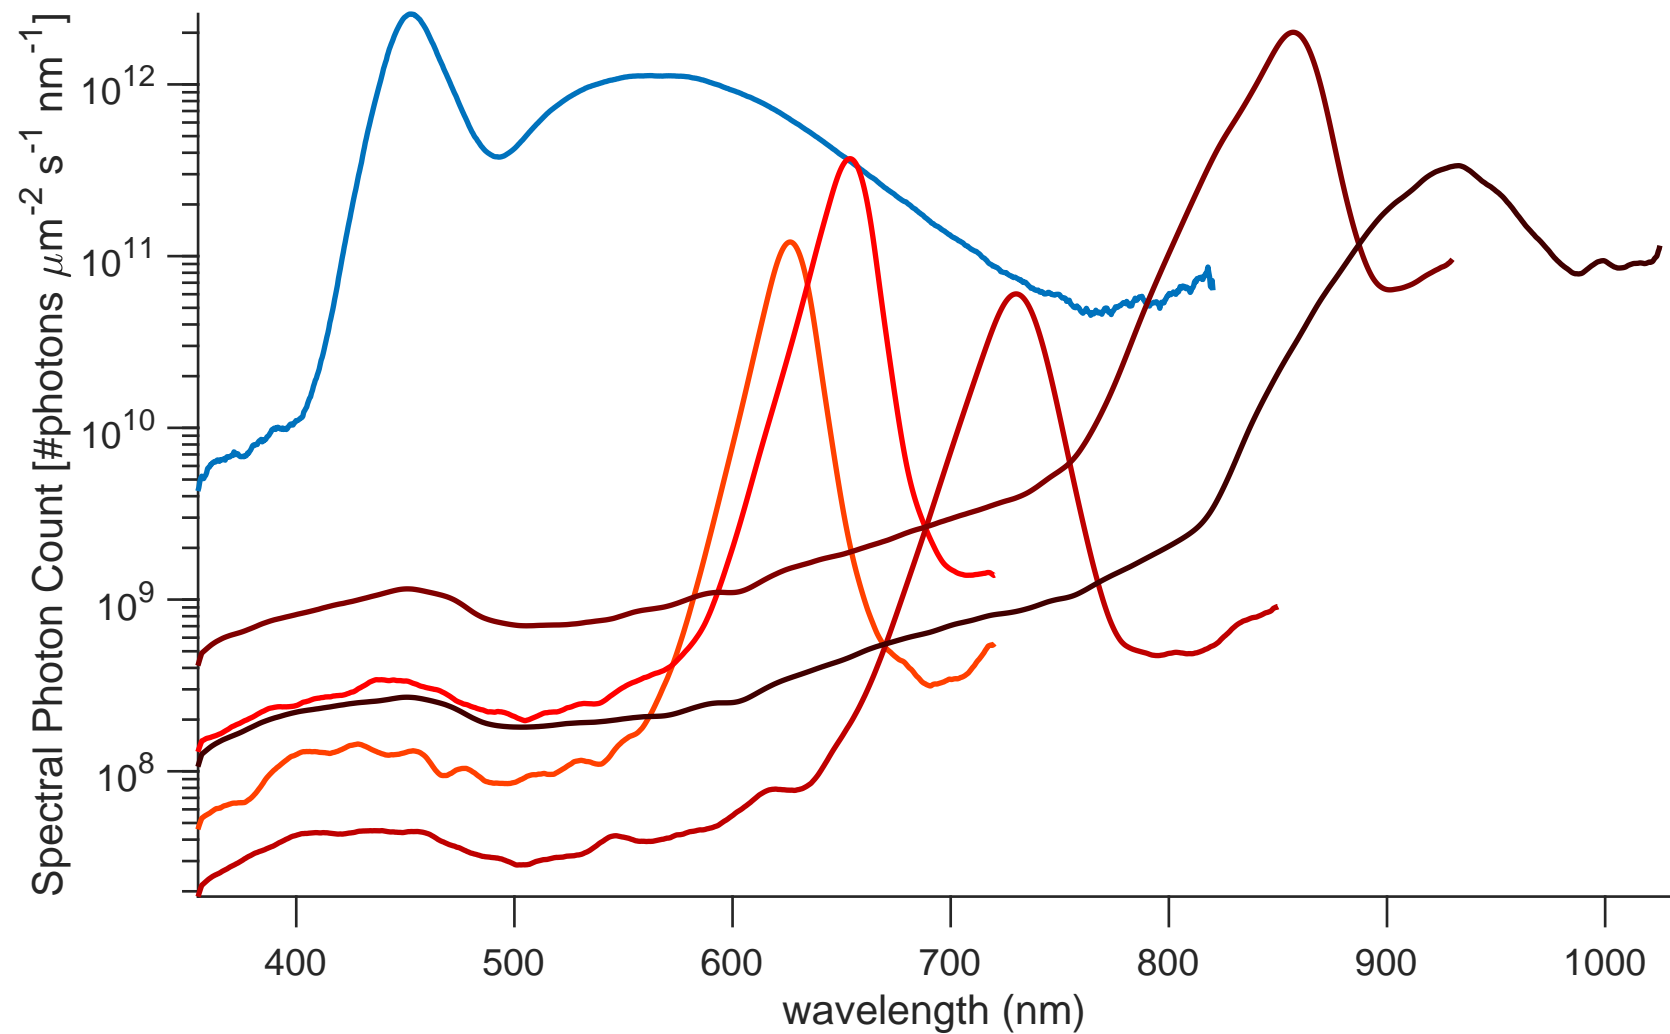

Supplement: supp [file elife-66429-supp-v1.zip]

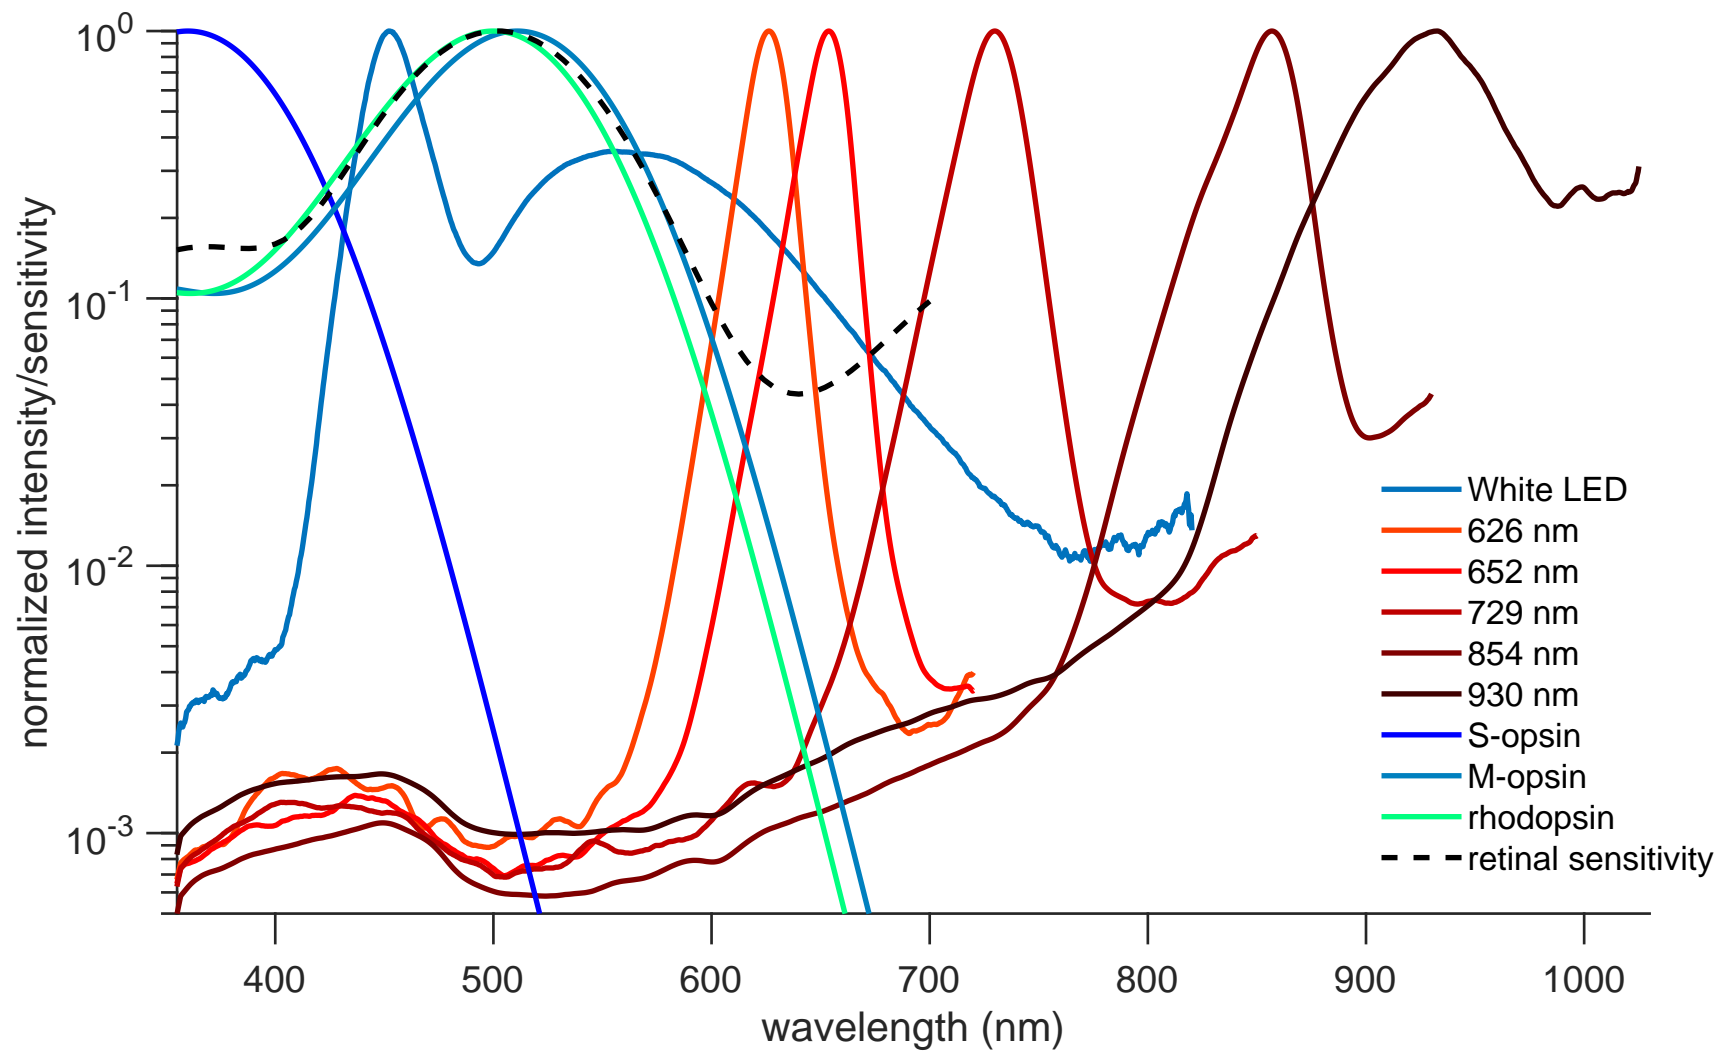

Supplement: supp [file elife-66429-supp-v1.zip]

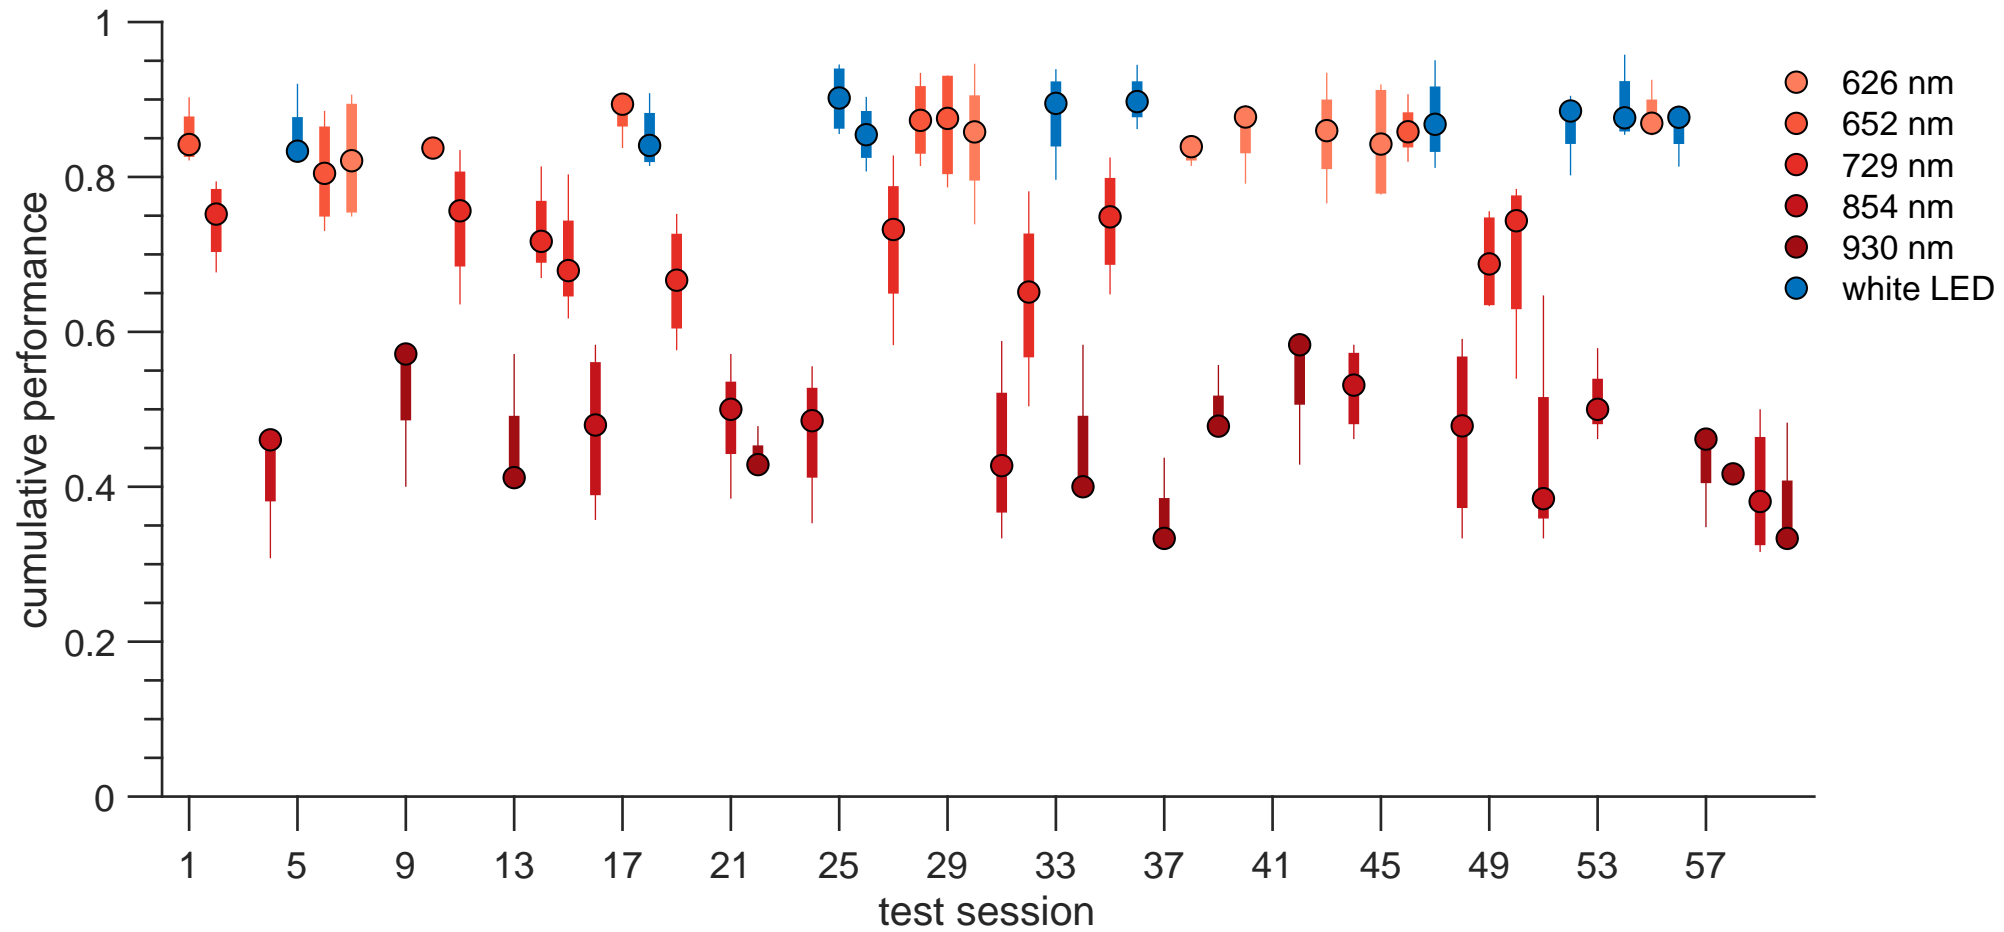

Supplement: supp [file elife-66429-supp-v1.zip]

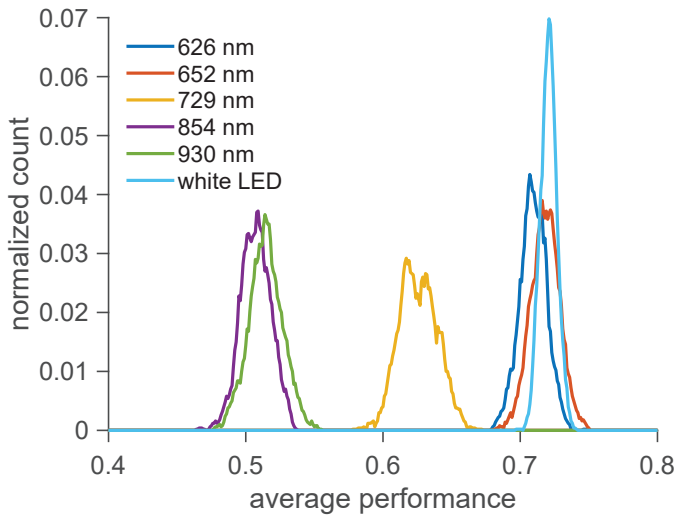

Supplement: supp [file elife-66429-supp-v1.zip]
